# Supplementary figures and images for: Advanced lipoxidation end products (ALEs) as RAGE binders: Mass spectrometric and computational studies to explain the reasons why
Source: PubMed Central journal article supplement — Redox Biol. 2018 Dec 18;23:101083. doi: 10.1016/j.redox.2018.101083 (PMC6859533; doi:10.1016/j.redox.2018.101083), 2018-12-18

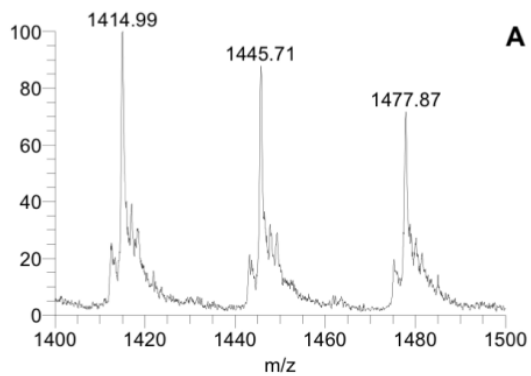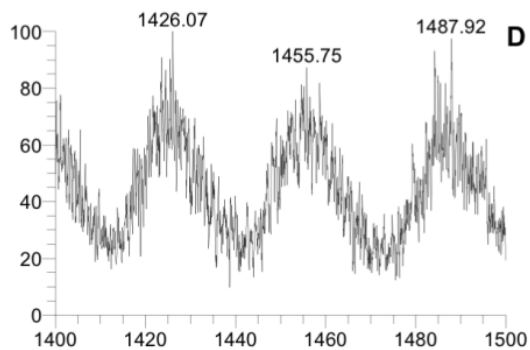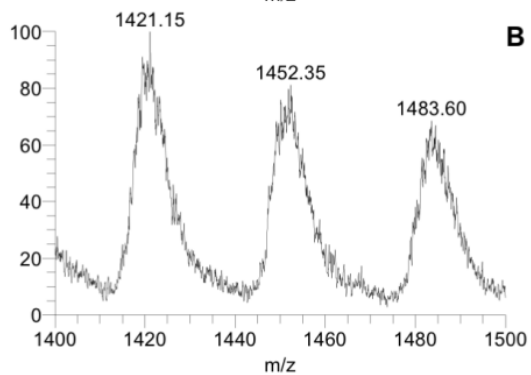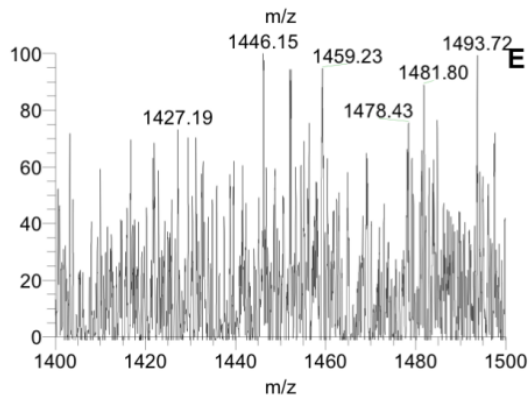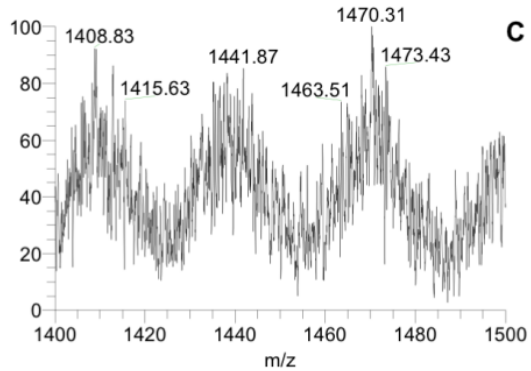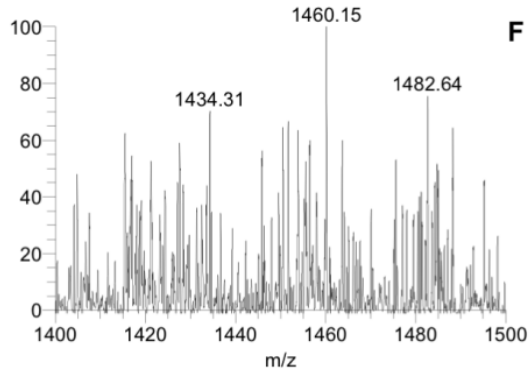

Supplementary Figure 1

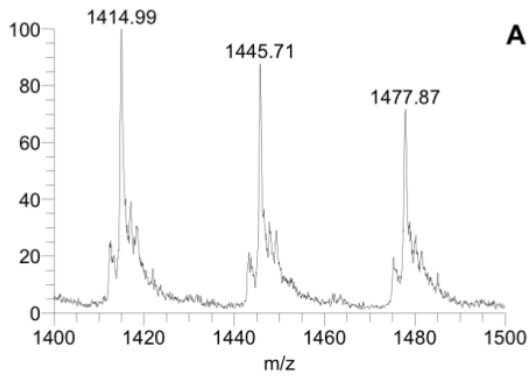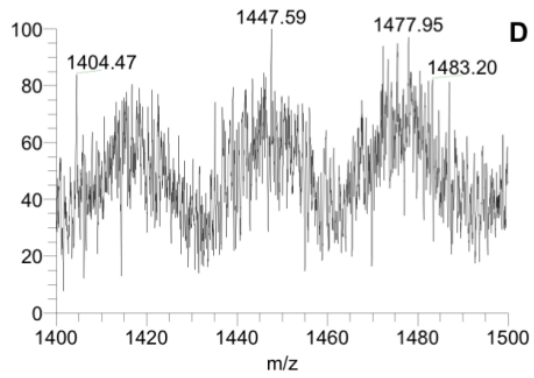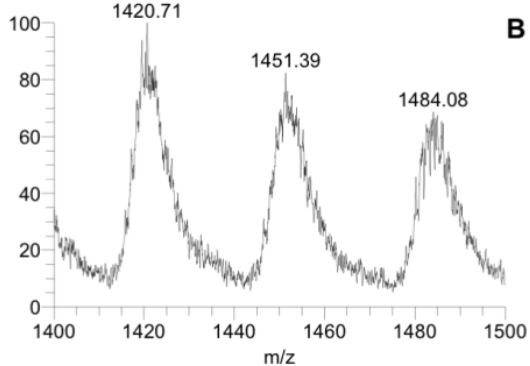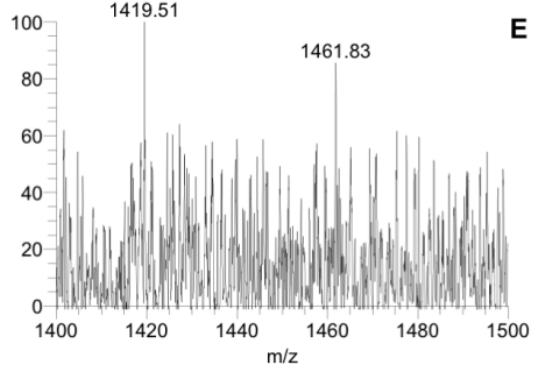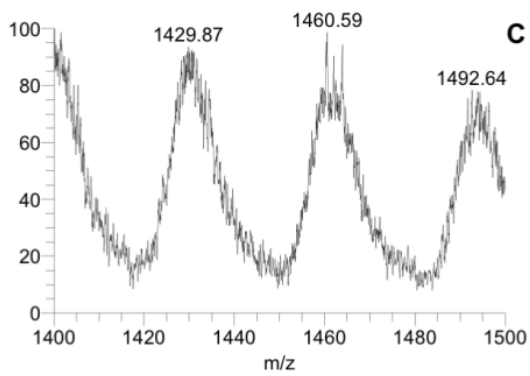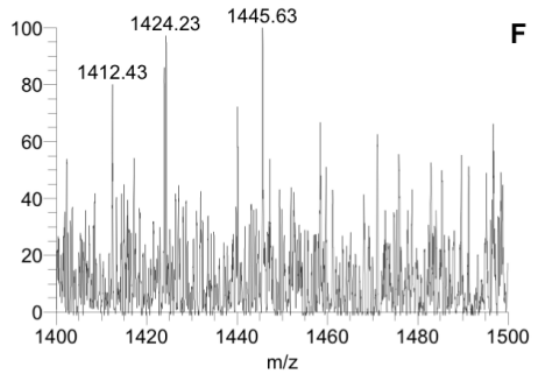

Supplementary Figure 2

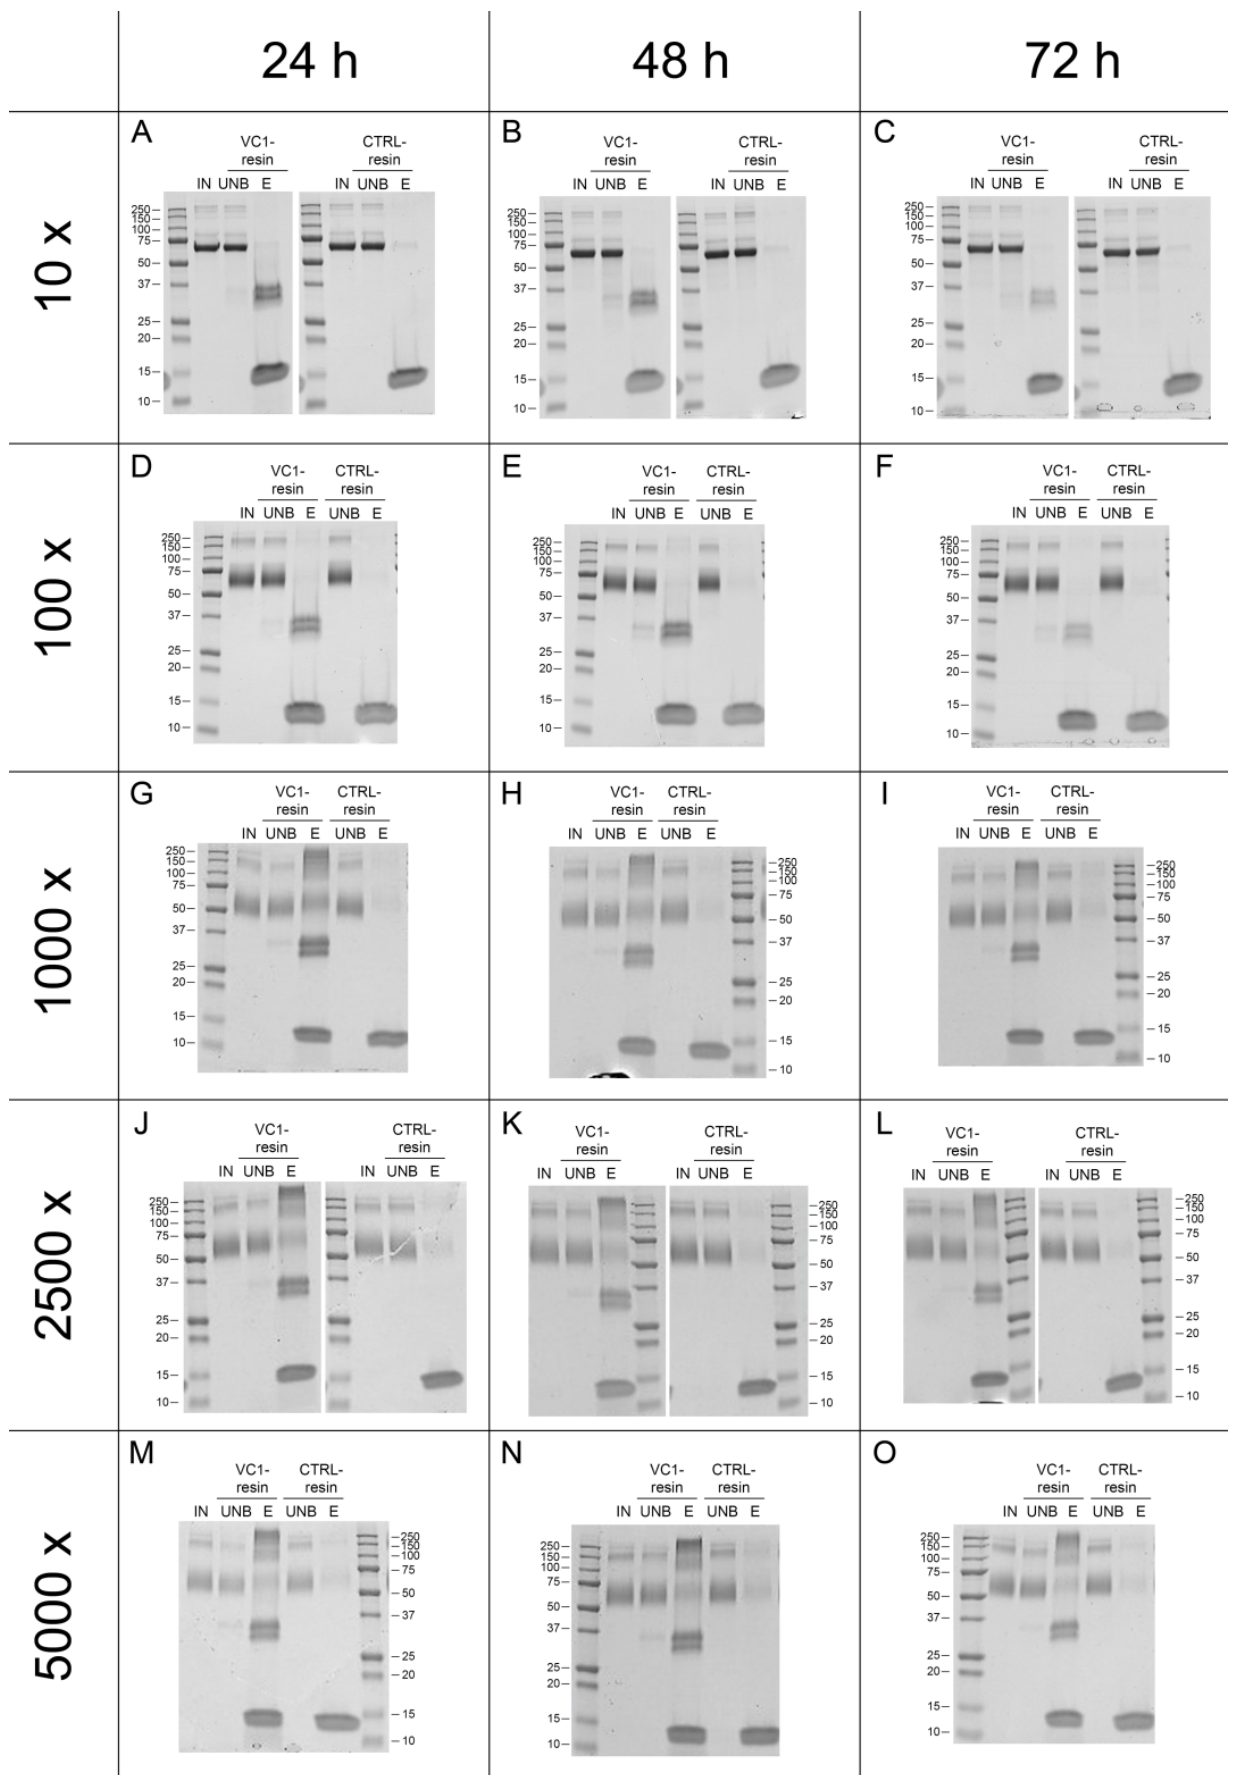

Supplementary Figure 3

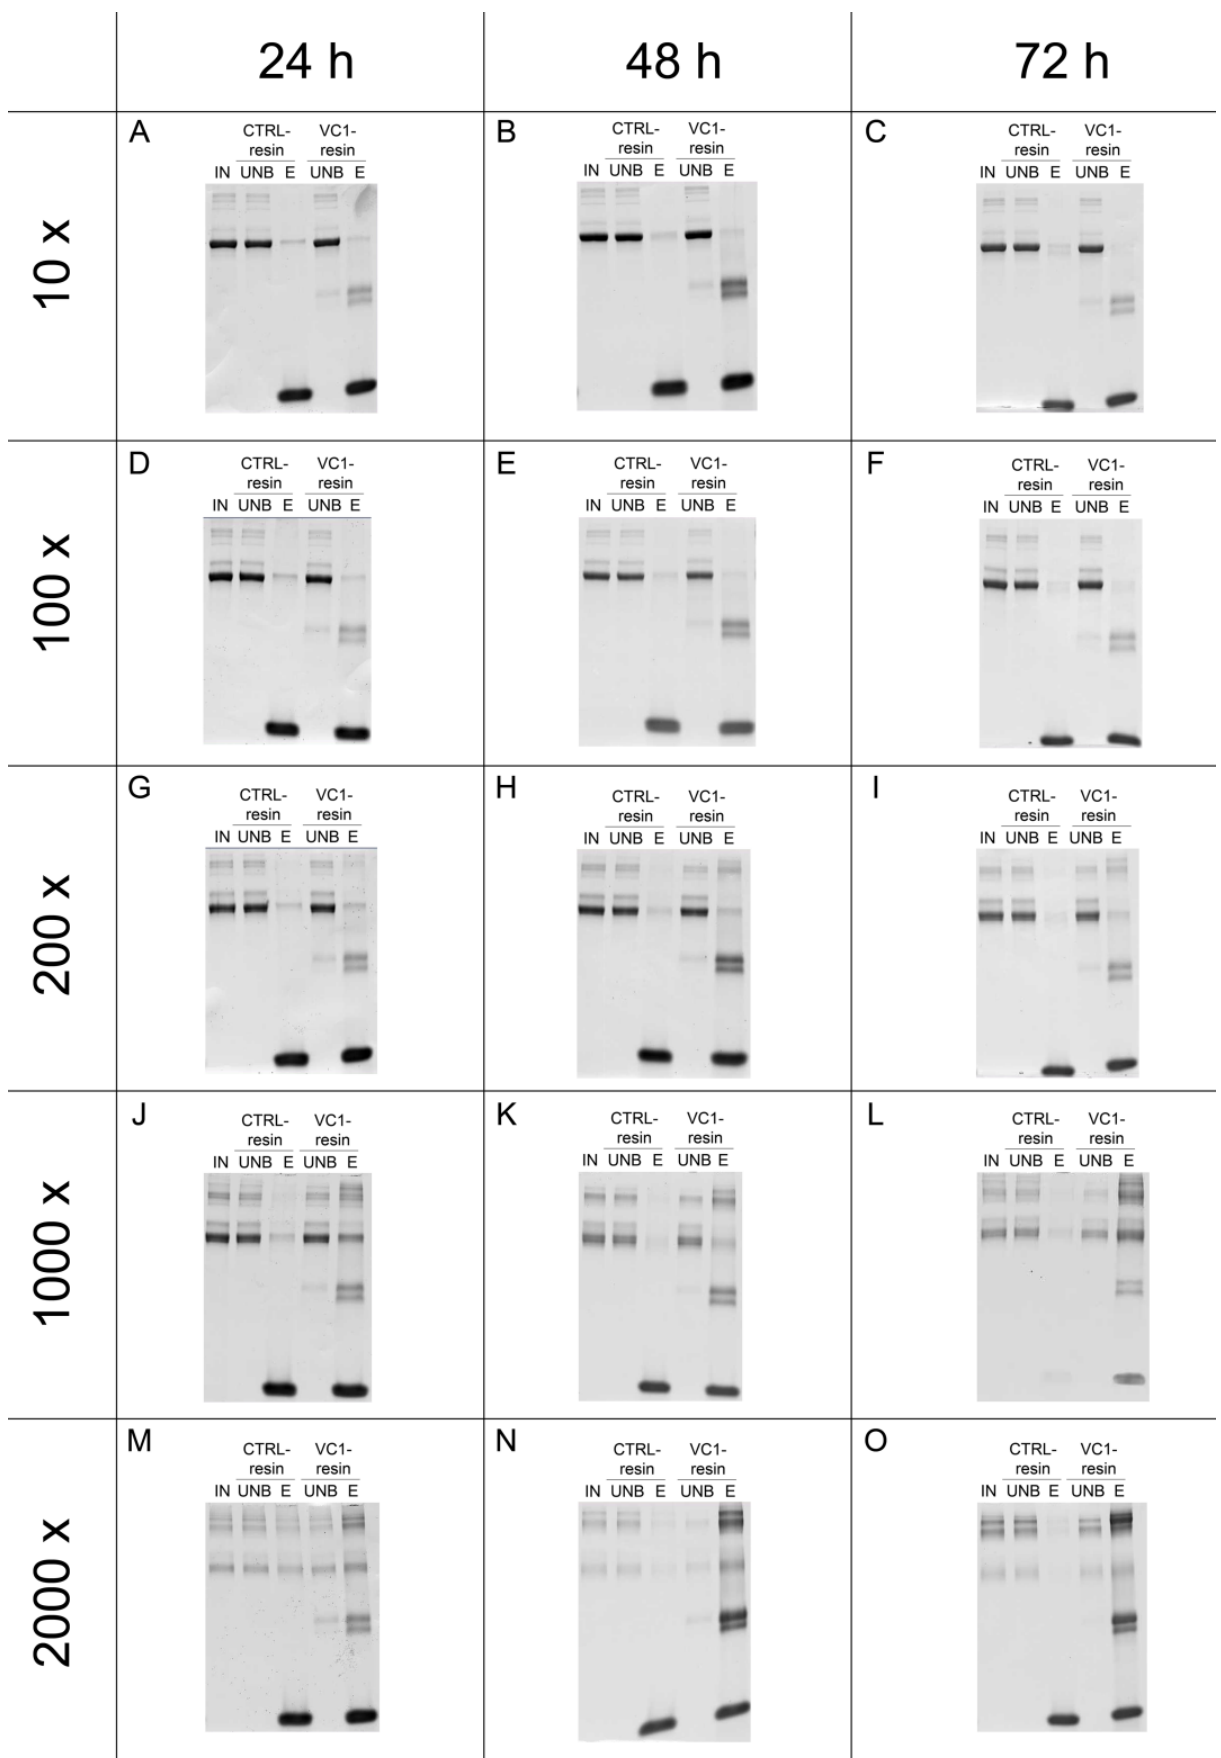

Supplementary Figure 4

Supplement: mmc1.pdf [file mmc1.pdf]
